# Supplementary material for: Lack of Gαi2 proteins in adipocytes attenuates diet-induced obesity
Source: PubMed Central journal article supplement — Mol Metab. 2020 May 30;40:101029. doi: 10.1016/j.molmet.2020.101029 (PMC7306590; doi:10.1016/j.molmet.2020.101029), 2020-05-30
Supplement: mmc1.pdf [file mmc1.pdf]

**Supplemental Figure 1:  $\alpha_{i2}$  expression analysis in adipocyte-specific *Gnai2*-deficient mice (*Gnai2*<sup>ako</sup>).** (A) schematic overview of the *Gnai2* gene and PCR strategy for recombination analyses. (B) genomic DNA analysis of isolated adipocytes and tails derived from control (genotypes: *Gnai2*<sup>fl/fl</sup>, *Gnai2*<sup>+/fl</sup>; AdipoqCreERT2<sup>+/tg</sup>; *Gnai2*<sup>+/fl</sup>) and *Gnai2*<sup>ako</sup> (genotype: *Gnai2*<sup>+/fl</sup>; AdipoqCreERT2<sup>+/tg</sup>) animals. Recombination is restricted to gWAT, iWAT, and isolated adipocytes derived from *Gnai2*<sup>ako</sup>, whereas brain (B), liver (L), pancreas (P), and tail (T) showed only the floxed band. M = marker. Statistical analysis of  $\alpha_{i1}$  expression levels in ctrl and *Gnai2*<sup>ako</sup> (C) gWAT, (D) iWAT, and (E) primary white adipocytes (WA). Lack of  $\alpha_{i2}$  restricted to adipocytes does not influence  $\alpha_{i1}$  expression levels in CD- or HFD-fed *Gnai2*<sup>ako</sup> animals. (F) Representative immunoblots of liver, skeletal muscle (SKM), and brain homogenates isolated from ctrl and *Gnai2*<sup>ako</sup> mice. (G) Statistical analysis of  $\alpha_{i2}$  expression levels in liver, skeletal muscle and brain of HFD-fed *Gnai2*<sup>ako</sup> and ctrl animals. (H-K) Statistical analysis of  $\alpha_{i2}$  expression levels in ctrl and *Gnai2*<sup>ako</sup> brown and white adipose tissue depots and primary white adipocytes.  $\alpha_{i2}$  protein levels are reduced by 60% in CD-fed *Gnai2*<sup>ako</sup> and 50% in HFD-fed *Gnai2*<sup>ako</sup> adipose tissue homogenates and by 80% in primary white adipocytes.  $\beta$ -actin levels were used as reference to normalize the data. Brown and white adipose tissue homogenates from the animals were analyzed in  $\geq 3$  independent experiments. Data were analyzed by multiple comparison two-way ANOVA followed by post-hoc comparison with Bonferroni's multiple comparison (C, D, G-H) or the Student *t* test (E, K) and are presented as means  $\pm$  SEMs. Statistical difference between the two genotypes is indicated: \*\**P* < 0.01.

**Supplemental Figure 2:** (A) Representative H&E stained histological sections of CD- and HFD-fed ctrl and *Gnai2*<sup>ako</sup> brown adipose tissue. Scale bar = 20  $\mu$ m (B) Similar fecal energy content in ctrl and *Gnai2*<sup>ako</sup> mice on a HFD

**Supplemental Figure 3: Similar liver parameters in HFD-fed ctrl and *Gnai2*<sup>ako</sup> mice.** (A) Liver weight and (B) liver to body weight ratio in ctrl and *Gnai2*<sup>ako</sup> mice fed an HFD. Representative H&E (C) and Oil Red O (D) stained liver histological sections of HFD-fed ctrl and *Gnai2*<sup>ako</sup> mice. Scale bars = 20  $\mu$ m (E) Liver triglyceride levels were slightly increased in HFD-fed *Gnai2*<sup>ako</sup> mice compared to littermate ctrl. Data were analyzed by multiple comparison two-way ANOVA followed by post-hoc comparison with Bonferroni's multiple comparison (A,B) or the Student *t* test (E) and are presented as means  $\pm$  SEMs. Statistical difference between the two genotypes is indicated: \*\**P* < 0.01

**Supplemental Figure 4: Unaltered glucose handling in 10-week-old HFD-fed *Gnai2*<sup>ako</sup> mice and CD-fed *Gnai2*<sup>ako</sup> mice.** (A) Basal blood glucose levels of young (10-week-old) HFD-fed ctrl and *Gnai2*<sup>ako</sup> mice. Basal blood glucose levels were similar in HFD-fed *Gnai2*<sup>ako</sup> mice compared to HFD-ctrl mice. (B) Blood glucose levels were similar in 10-week-old HFD-fed ctrl and *Gnai2*<sup>ako</sup> mice following i.p. injection of 2 mg/g body weight glucose after overnight fasting (ctrl<sub>HFD</sub> n = 7; *Gnai2*<sup>ako</sup><sub>HFD</sub> n = 7). (C) Blood glucose levels were similar in 28-week-old CD-fed ctrl and *Gnai2*<sup>ako</sup> mice following i.p. injection of 2 mg/g body weight glucose after overnight fasting (ctrl<sub>CD</sub> n = 12; *Gnai2*<sup>ako</sup><sub>HFD</sub> n = 12). (D) Similar plasma insulin levels in CD-fed ctrl and *Gnai2*<sup>ako</sup> animals during the glucose tolerance test (ctrl<sub>CD</sub> n = 12; *Gnai2*<sup>ako</sup><sub>HFD</sub> n = 12). (E) Unaltered insulin tolerance tests in CD-fed *Gnai2*<sup>ako</sup> mice compared to CD-fed ctrls receiving 1 mU/g body weight insulin following a 4-h-fasting period (ctrl<sub>CD</sub> n = 12; *Gnai2*<sup>ako</sup><sub>HFD</sub> n = 12). Unaltered resistin (F) and leptin (G) levels in the plasma of HFD-fed *Gnai2*<sup>ako</sup> compared to HFD-fed ctrl mice. (H) mRNA expression levels of adiponectin were significantly higher in gWAT and iWAT of HFD-fed *Gnai2*<sup>ako</sup> mice compared to HFD-ctrl mice. Data were analyzed using multiple comparison two-way ANOVA followed by post-hoc comparison with Bonferroni's multiple comparison (B-H) or the Student *t* test (A) and are presented as means  $\pm$  SEMs. Statistical difference between the two genotypes is indicated: \**P* < 0.05, \*\**P* < 0.01, \*\*\**P* < 0.001.

**Supplemental Figure 5: Unaltered intracellular cAMP levels and *ex vivo* lipolysis in CD-fed *Gnai2*<sup>ako</sup> mice.** cAMP accumulation was measured under basal and stimulated (10  $\mu$ M isoproterenol) conditions in gWAT (A) and iWAT (B) of CD-fed ctrl and *Gnai2*<sup>ako</sup> mice for 15 minutes in the presence of 1 mM IBMX. Glycerol release was measured in gWAT (C) and iWAT (D) of CD-fed ctrl and *Gnai2*<sup>ako</sup> mice. No

significantly differences were detectable under CD-feeding. **(E)** Plasma triglyceride content was similar in HFD-fed *Gnai2*<sup>ako</sup> compared to HFD-fed ctrl mice. Data were analyzed using multiple comparison two-way ANOVA followed by post-hoc comparison with Bonferroni's multiple comparison **(A-E)** and are presented as means  $\pm$  SEMs. Statistical difference between the two genotypes is indicated: \* $P < 0.05$ , \*\* $P < 0.01$ , \*\*\* $P < 0.001$ .

**Supplemental Figure 6: Mitochondria function of primary brown and white adipocytes derived from HFD-fed *Gnai2*<sup>ako</sup> and control mice.** Oxygen consumption rate (OCR) of brown **(A)** and white **(B)** adipocytes was measured before and after the addition of inhibitors to determine several parameters of mitochondrial respiration. Initially, baseline and NE-stimulated OCR were measured. Next oligomycin, a complex V inhibitor, was added to derive ATP-linked respiration following carbonyl cyanide-p-trifluoromethoxyphenyl-hydrazon (FCCP), a protonophore, addition to collapse the inner membrane gradient. Lastly, antimycin A and rotenone, inhibitors of complex III and I, were added to reveal non-mitochondrial respiration. **(C)** Oxygen consumption rate (OCR) is measured before and after the addition of norepinephrine (NE) (1  $\mu$ M). NE-stimulated OCR was significantly decreased in primary white adipocytes isolated from *Gnai2*<sup>ako</sup> mice compared to ctrl mice. Data were analyzed using multiple comparison two-way ANOVA followed by post-hoc comparison with Bonferroni's multiple comparison **(A-C)** and are presented as means  $\pm$  SEMs. Statistical difference between the two genotypes is indicated: \* $P < 0.05$ , \*\* $P < 0.01$ , \*\*\* $P < 0.001$ .
