# Supplementary figures and images for: Lack of Gαi2 proteins in adipocytes attenuates diet-induced obesity
Source: PubMed Central journal article supplement — Mol Metab. 2020 May 30;40:101029. doi: 10.1016/j.molmet.2020.101029 (PMC7306590; doi:10.1016/j.molmet.2020.101029), 2020-05-30

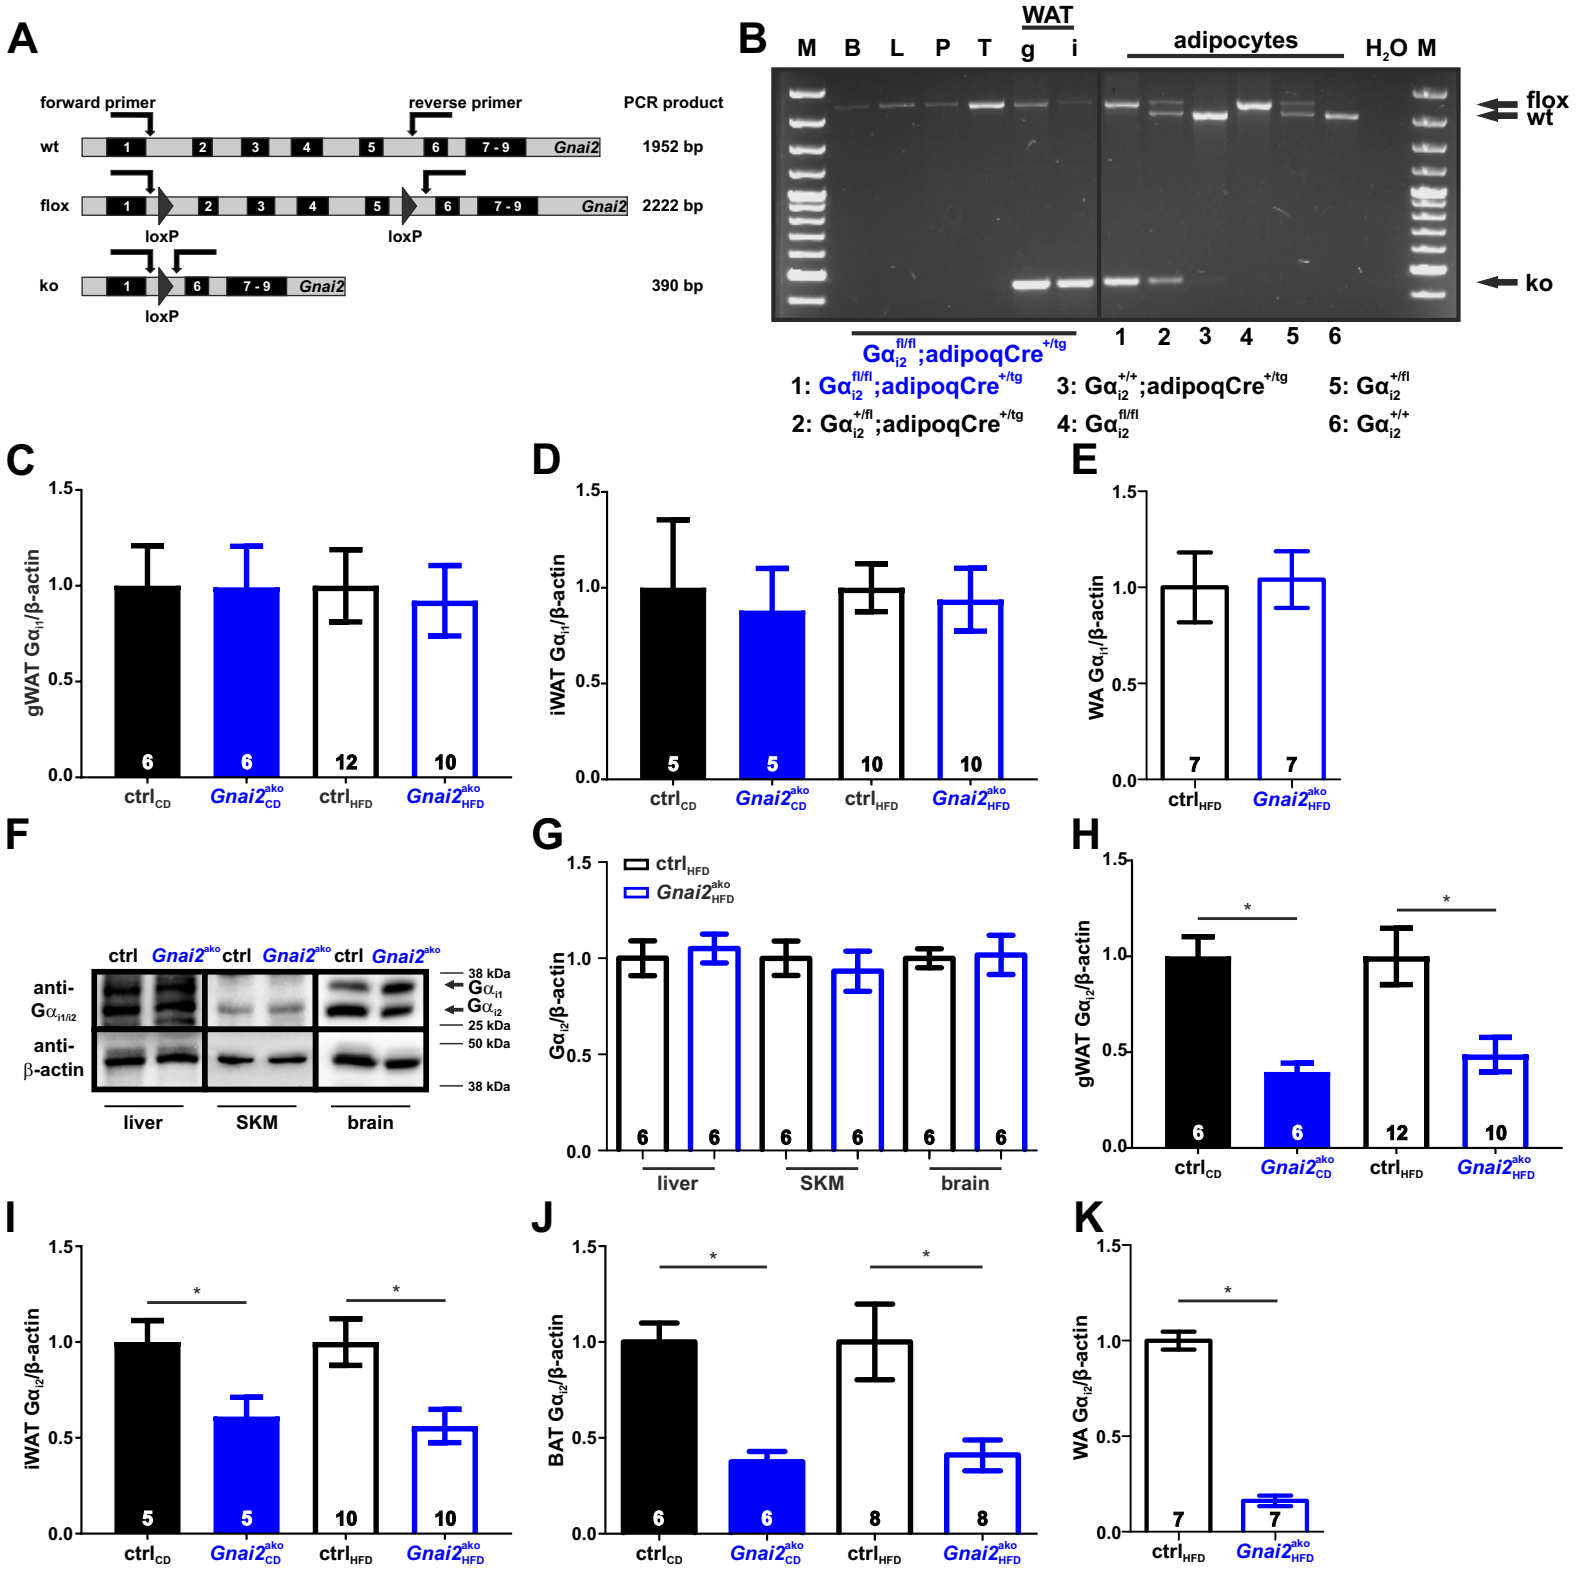

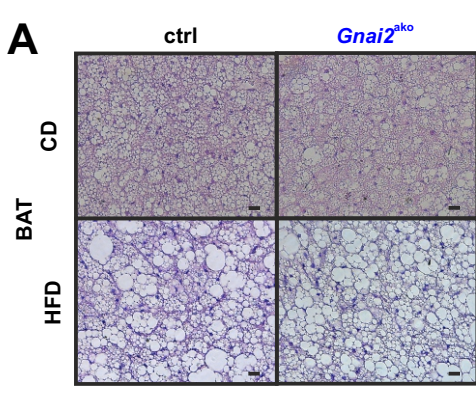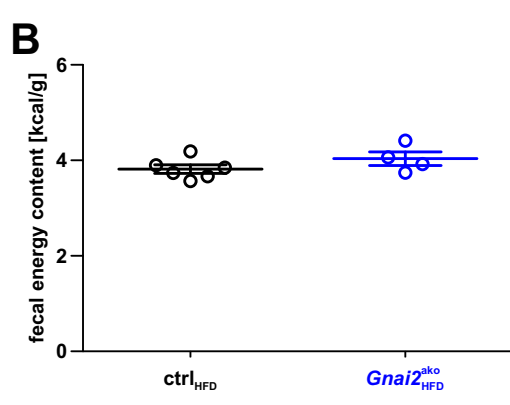

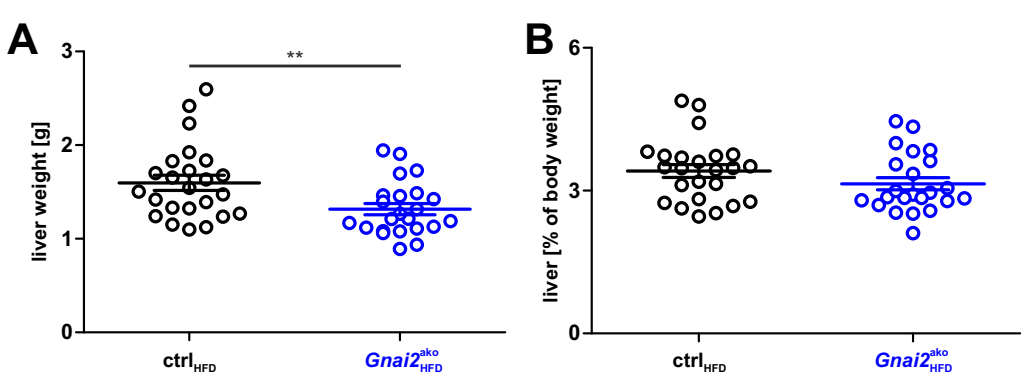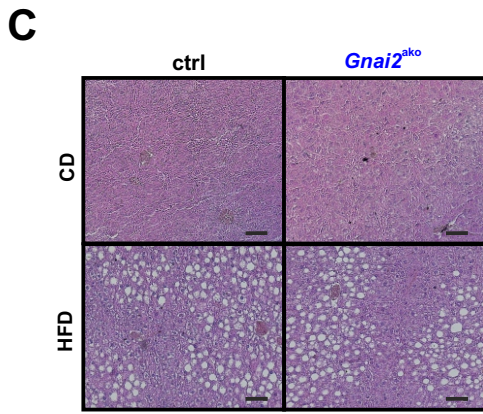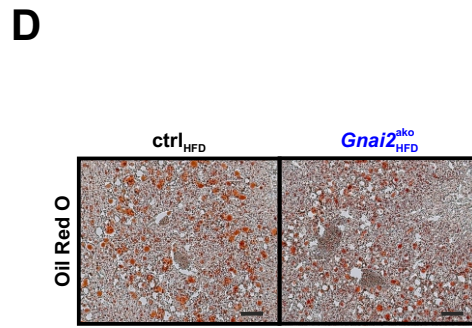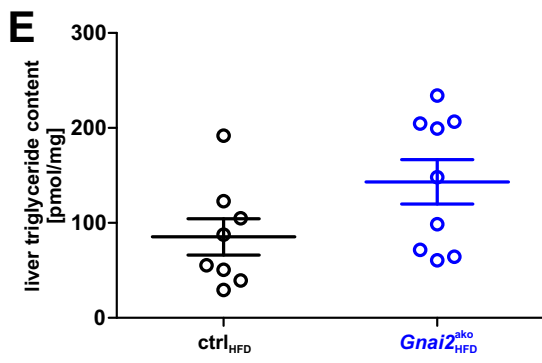

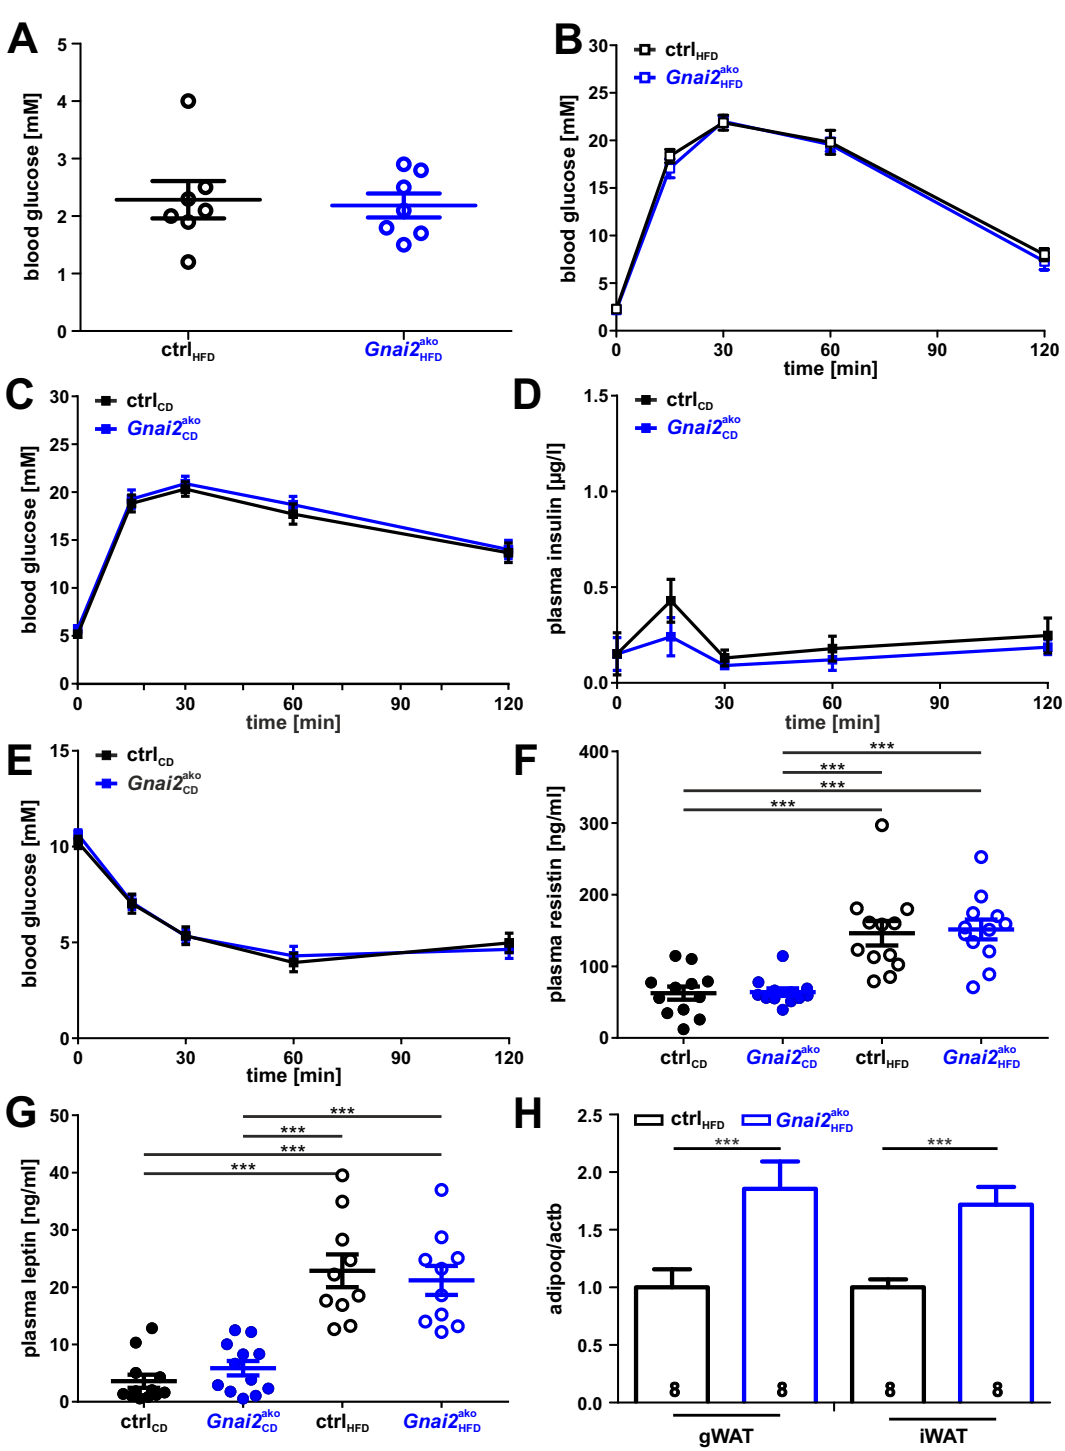

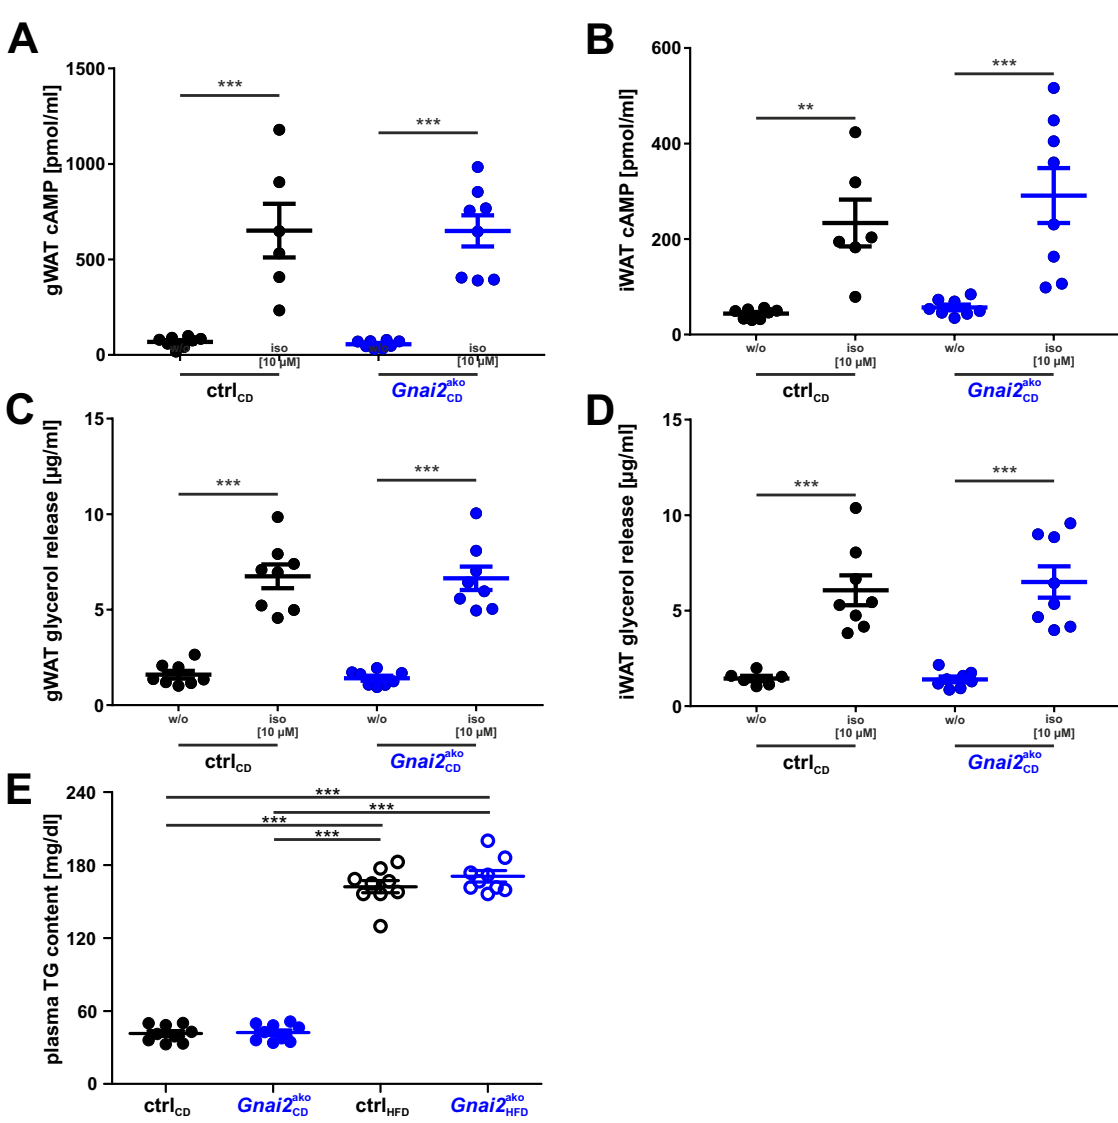

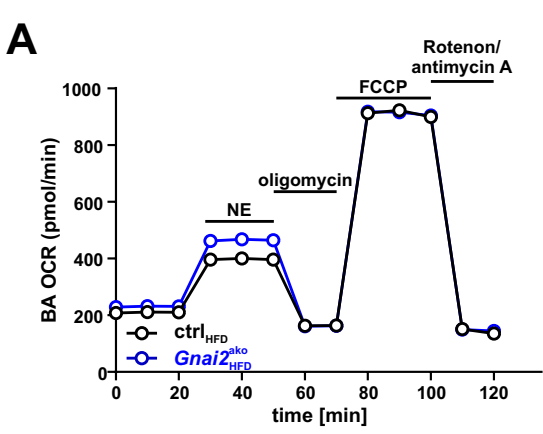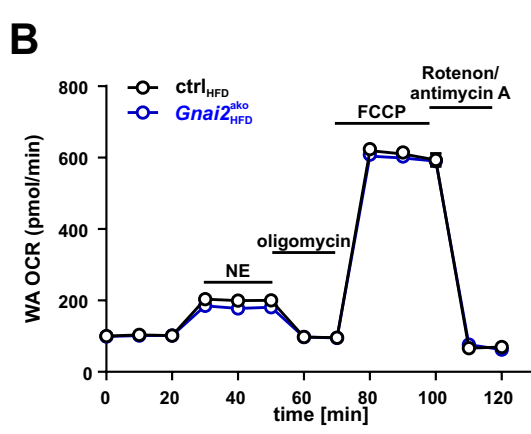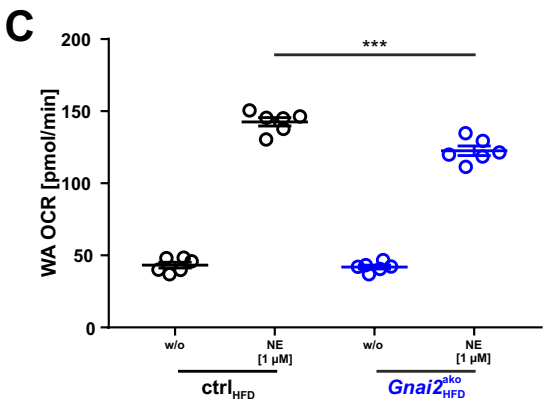

Supplement: mmc2.pdf [file mmc2.pdf]
